## Prostate cancer: ESMO Clinical Recommendations for diagnosis, treatment and follow-up

A. Horwich<sup>1</sup>, C. Parker<sup>2</sup> & V. Kataja<sup>3</sup>

On behalf of the ESMO Guidelines Working Group\*

<sup>1,2</sup>Department of Clinical Oncology, Royal Marsden Hospital, Sutton, UK; <sup>3</sup>Department of Oncology, Kuopio University Hospital, Kuopio, Finland

### incidence and mortality

- The crude incidence of prostate cancer in the European Union is 78.9/100 000 men/year. It is the most common cancer in men.
- The mortality in the EU is 30.6/100 000 men/year.
- Subclinical prostate cancer is present in the majority of men.
- Screening of healthy men using prostate-specific antigen (PSA) testing increases the incidence (overdiagnosis). The effect of screening and early intervention on mortality is not known.

### diagnosis

- Serum PSA should be measured and digital rectal examination (DRE) carried out in patients presenting with urinary symptoms.
- Prostate biopsy should be offered to men suspected to have a clinically significant prostate cancer, such as those with an abnormal DRE and elevated serum PSA.
- Prostate biopsy should be performed under transrectal ultrasound (TRUS) guidance, and a minimum of eight cores obtained.
- The extent of involvement of each core, and the Gleason score should be reported.

### staging and risk assessment

- General health and co-morbidities should be assessed.
- Clinical T stage should be evaluated by DRE.
- Pelvic imaging using MRI or CT should be performed before radical treatment when Partin tables indicate >15% risk of nodal involvement.

- Bone scintigraphy should be performed if bone metastases are suspected clinically, if the Gleason score is >4 + 3 or serum PSA is >15 mg/l [III, B].

### treatment

#### localized disease (T1–2 N0/X M0/X)

- There is no general consensus as to what constitutes best treatment.

Patients should be informed of the potential benefits and harms of the various options.

- In the only randomized trial reported to date, radical prostatectomy improved overall survival at 10 years by 5% in comparison with watchful waiting (73% versus 68%,  $P = 0.04$ ), but these results may not be generalizable to screen-detected cancers.
- In the only randomized trial to date, radical prostatectomy increased the rate of erectile dysfunction by 35% (80% versus 45%), and urinary leakage by 28% (49% versus 21%), in surgical centers.
- For low-risk disease (T1–2a, Gleason <6, PSA <10 mg/l), active surveillance with selected delayed intervention has given 99% disease-specific survival at 8 years.
- External beam radiotherapy should be delivered using conformal techniques, to a minimum target dose of 70 Gy given in 2.0 Gy fractions or the equivalent [II, B]. In non-randomized prospective series brachytherapy with permanent implants results in similar long-term survival to radical prostatectomy with less chronic urinary symptoms and erectile dysfunction.
- Following radical prostatectomy patients should be monitored with a sensitive PSA assay, with salvage radiotherapy to the prostate bed given in the event of PSA failure.

#### locally advanced disease (T3–4 N0/X M0/X)

- Long-term hormone therapy (androgen suppression or bicalutamide monotherapy) is a standard treatment.

\*Correspondence to: ESMO Guidelines Working Group, ESMO Head Office, Via L. Taddei 4, CH-6962 Viganello-Lugano, Switzerland

Approved by the ESMO Guidelines Working Group: February 2002, last update October 2007. This publication supercedes the previously published version—Ann Oncol 2007; 18 (Suppl 2): ii36–ii37.

Conflict of interest: Prof. Horwich has reported no conflicts of interest; Dr Parker has not reported any conflicts of interest.

- Patients receiving external beam radiotherapy should receive androgen suppression before, during and after radiotherapy [II, A], for a minimum of 6 months duration.
- Patients receiving long-term bicalutamide monotherapy should be given breast bud irradiation (8–10 Gy in one fraction) to prevent painful gynaecomastia [I, A].

### metastatic disease

- Androgen suppression using bilateral orchidectomy or an luteinizing hormone-releasing hormone (LHRH) agonist should be first-line treatment.
  - Short-course antiandrogen should be used to prevent disease flare on starting an LHRH agonist.
  - Patients with castration-refractory disease should have continued androgen suppression
  - Docetaxel using a 3-weekly schedule should be considered for symptomatic, castration-refractory disease [II, A].
  - External beam radiotherapy should be offered for patients with painful bone metastases from castration-refractory disease. Fractioning  $1 \times 8$  Gy or  $10 \times 3$  Gy may be used with equal pain-reducing efficacy [II, A].
  - Radioisotope therapy (e.g. strontium-89 or samarium-153-EDTMP) should be considered for patients with painful bone metastases from castration-refractory disease [II, A].
  - Patients with castration-refractory disease should receive second-line hormonal therapy (e.g. antiandrogen, corticosteroid) and be considered for third-line (e.g. oestrogen).
  - Intravenous bisphosphonates (e.g. pamidronate) should be considered for patients with bone pain resistant to palliative radiotherapy and conventional analgesics [II, A].
  - Patients with castration-refractory disease should be managed in collaboration with dedicated palliative care services.
3. Gleave ME, Coupland D, Drachenberg D et al. Ability of serum prostate-specific antigen levels to predict normal bone scans in patients with newly diagnosed prostate cancer. *Urology* 1996; 47: 708–712.
  4. Partin AW, Mangold LA, Lamm DM et al. Contemporary update of prostate cancer staging nomograms (Partin Tables) for the new millennium. *Urology* 2001; 58: 843–848.
  5. Lu Yao GL, Yao S-L. Population based study of long-term survival in patients with clinically localised prostate cancer. *Lancet* 1997; 349: 906–910.
  6. Bill-Axelsson, Holmberg L, Ruutu M et al. Radical prostatectomy versus watchful waiting in early prostate cancer. *N Engl J Med* 2005; 352: 1977–1984.
  7. Klotz L. Active surveillance with selective delayed intervention: using natural history to guide treatment in good risk prostate cancer. *J Urol* 2004; 172: S48–S51.
  8. Dearnaley DP, Khoo VS, Norman AR et al. Comparison of radiation side-effects of conformal and conventional radiotherapy in prostate cancer: a randomised trial. *Lancet* 1999; 353: 267–272.
  9. Bolla M, van Poppel H, Collette L et al. Postoperative radiotherapy after radical prostatectomy: a randomised controlled trial (EORTC trial 22911). *Lancet* 2005; 366: 572–578.
  10. Lawton CA, Winter K, Murray K et al. Updated results of the phase III Radiation Therapy Oncology Group (RTOG) trial 85-31 evaluating the potential benefit of androgen suppression following standard radiation therapy for unfavourable prognosis carcinoma of the prostate. *Int J Radiat Oncol Biol Phys* 2001; 49: 937–946.
  11. Pilepich MV, Winter K, John MJ et al. Phase III radiation Therapy Oncology Group (RTOG) trial 86-10 of androgen deprivation adjunct to definitive radiotherapy in locally advanced carcinoma of the prostate. *Int J Radiat Oncol Biol Phys* 2001; 50: 1243–1252.
  12. D'Amico AV, Manda J, Loffredo M et al. 6-month androgen suppression plus radiation therapy versus radiation therapy alone for patients with clinically localized prostate cancer: a randomized controlled trial. *JAMA* 2004; 292: 821–827.
  13. Denham JW, Steigler A, Lamb DS et al. Short-term androgen deprivation and radiotherapy for locally advanced prostate cancer: results from the Trans-Tasman Radiation Oncology Group 96.01 randomised controlled trial. *Lancet Oncol* 2005; 6: 841–850.
  14. Widmark A, Fosså SD, Lund MP et al. Does prophylactic breast irradiation prevent antiandrogen-induced gynaecomastia? Evaluation of 253 patients in the randomized Scandinavian trial SPCG-7/SFUO-3. *Urology* 2003; 61: 145–151.
  15. Tannock IF, de Witt R, Berry WR et al. Docetaxel plus prednisone or mitoxantrone plus prednisone for advanced prostate cancer. *N Engl J Med* 2004; 351: 1502–1512.
  16. Petrylak DP, Tangen C, Hussain M et al. Docetaxel and estramustine compared with mitoxantrone and prednisone for advanced refractory prostate cancer. *N Engl J Med* 2004; 351: 1513–1520.
  17. Porter AT, McEwan AJ, Powe JE et al. Results of a randomized phase-III trial to evaluate the efficacy of strontium-89 adjuvant to local field external beam irradiation in the management of endocrine resistant metastatic prostate cancer. *Int J Radiat Oncol Biol Phys* 1993; 25: 805–813.
  18. Quilty P, Kirk D, Bolger JJ et al. A comparison of the palliative effects of strontium-89 and external beam radiotherapy in metastatic prostate cancer. *Radiother Oncol* 1994; 31: 33–40.
  19. Saad F, Gleason DM, Murray R et al. Long-term efficacy of zoledronic acid for the prevention of skeletal complications in patients with metastatic hormone-refractory prostate cancer. *J Natl Cancer Inst* 2004; 96: 879–882.

### note

Levels of evidence [I–V] and grades of recommendation [A–D] as used by the American Society of Clinical Oncology are given in square brackets. Statements without grading were considered justified standard clinical practice by the experts and the ESMO faculty.

### literature

1. Draisma G, Boer R, Otto SJ et al. Lead times and overdetection due to prostate-specific antigen screening: estimates from the European Randomized Study of Screening for Prostate Cancer. *J Natl Cancer Inst* 2003; 95: 868–878.
2. Thompson IM, Ankerst DP, Chi C et al. Assessing prostate cancer risk: results from the Prostate Cancer Prevention Trial. *J Natl Cancer Inst* 2006; 98: 529–534.
